# Supplementary material for: Interactions of Self-Assembled Bletilla Striata Polysaccharide Nanoparticles with Bovine Serum Albumin and Biodistribution of Its Docetaxel-Loaded Nanoparticles
Source: PubMed Central journal article supplement (PMC6358745; doi:10.3390/pharmaceutics11010043), 2019-01-19
Supplement: pharmaceutics-11-00043-s001.pdf [file pharmaceutics-11-00043-s001.pdf]

# Supplementary Materials: Interactions of Self-Assembled *Bletilla Striata* Polysaccharide Nanoparticles with Bovine Serum Albumin and Biodistribution of Its Docetaxel-Loaded Nanoparticles

Guangyuan Zhang, Jin Qiao, Xin Liu, Yuran Liu, Ji Wu, Long Huang, Danyang Ji and Qingxiang Guan

**Table S1.** Absorbance values of blank BSPs-SA nanoparticles at the concentration of 0.1–0.7 mg/mL.

| Blank BSPs-SA nanoparticles (mg/mL) | 0.1    | 0.2    | 0.3    | 0.4  | 0.5    | 0.6    | 0.7    |
|-------------------------------------|--------|--------|--------|------|--------|--------|--------|
| $A_{278}$                           | 0.0226 | 0.0411 | 0.0936 | 0.16 | 0.2185 | 0.3016 | 0.3653 |

**Table S2.** Absorbance values of BSA/BSPs-SA complex at the concentration of 0.1–0.7 mg/mL.

| BSA/BSPs-SA complex (mg/mL) | 0.1    | 0.2    | 0.3    | 0.4    | 0.5    | 0.6    | 0.7    |
|-----------------------------|--------|--------|--------|--------|--------|--------|--------|
| $A_{278}$                   | 0.4081 | 0.4809 | 0.5454 | 0.6007 | 0.6905 | 0.7882 | 0.8372 |
